# Supplementary material for: Impact of the metal centre (Al3+, Fe3+) on the post-synthetic lithiation of functionalized MIL-53s and the electrochemical properties of lithiated derivatives
Source: Royal Society of Chemistry journal article supplement (doi:10.1039/d3me00030c), 2023-01-01
Supplement: d3me00030c1.pdf [file d3me00030c1.pdf]

# **Impact of the metal centre ( $\text{Al}^{3+}$ , $\text{Fe}^{3+}$ ) on the post-synthetic lithiation of functionalized MIL-53s and electrochemical properties of the lithiated derivatives**

Morgane Denis,<sup>a</sup> Hubert Chevreau,<sup>b</sup> Pablo Salcedo-Abaira,<sup>a</sup> Philippe Moreau,<sup>a</sup> Nicolas Dupré,<sup>a</sup> Michael Paris,<sup>a</sup> Philippe Poizot<sup>a</sup> and Thomas Devic<sup>\*a</sup>

<sup>a</sup> *Nantes Université, CNRS, Institut des Matériaux de Nantes Jean Rouxel, IMN, F-44000 Nantes, France. Email : thomas.devic@cnrs-imn.fr.*

<sup>b</sup> *Synchrotron SOLEIL, L'Orme des Merisiers, F-91192 Saint-Aubin, BP 48, France.*

## **Table of Content**

|                                                                   |            |
|-------------------------------------------------------------------|------------|
| <b>1. Powder X-ray diffraction</b>                                | <b>S2</b>  |
| <b>2. Optical images</b>                                          | <b>S6</b>  |
| <b>3. Thermogravimetric analysis</b>                              | <b>S6</b>  |
| <b>4. Infrared spectroscopy</b>                                   | <b>S7</b>  |
| <b>5. Transmission electron microscopy</b>                        | <b>S9</b>  |
| <b>6. Inductively coupled plasma-atomic emission spectroscopy</b> | <b>S11</b> |

## 1. Powder X-ray diffraction

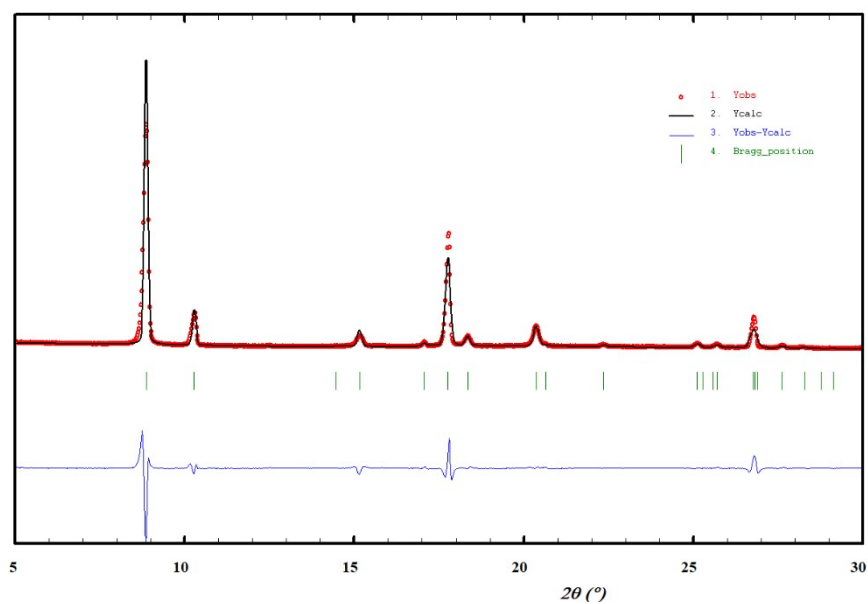

**Figure S1.** Le Bail fit of MIL-53(Al)-(OH)<sub>2</sub> as-prepared.

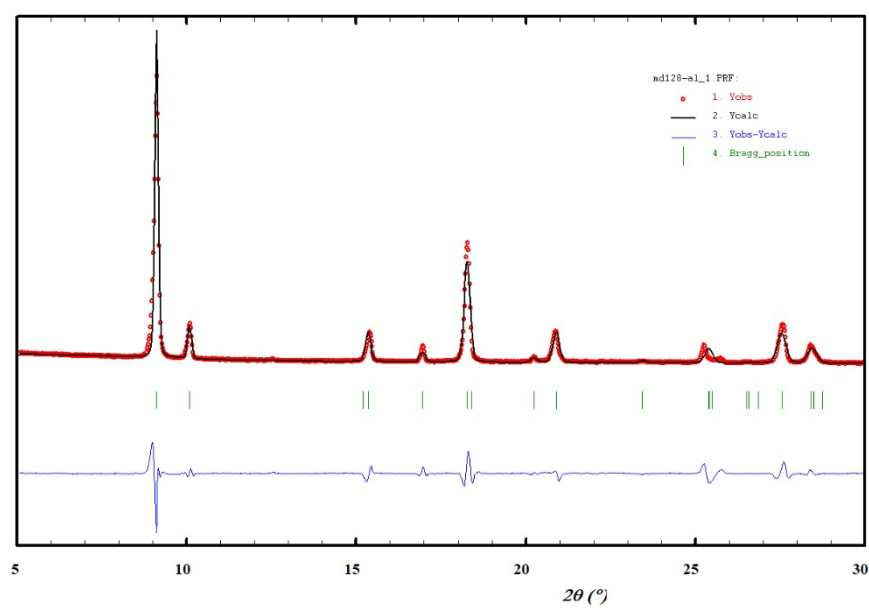

**Figure S2.** Le Bail fit of MIL-53(Al)-(OH)<sub>2</sub> fully hydrated.

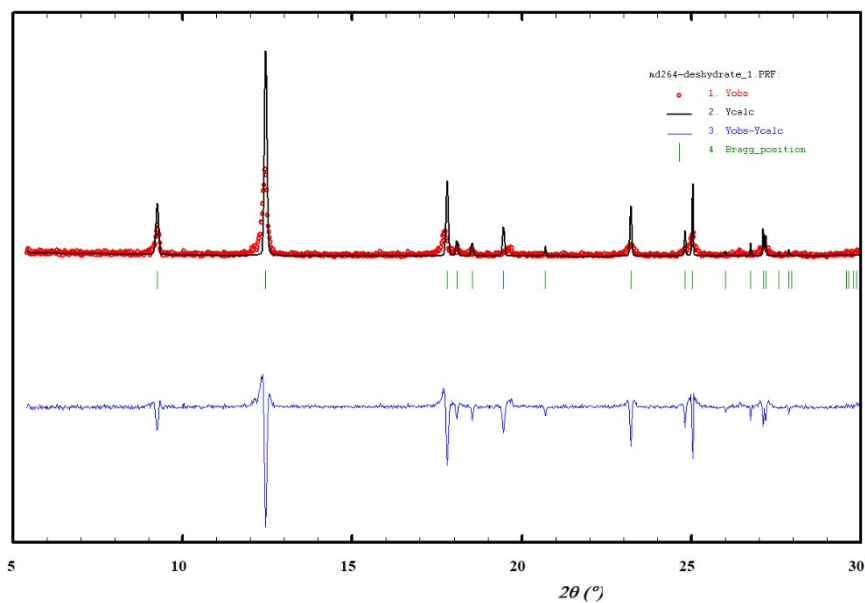

**Figure S3.** Le Bail fit of MIL-53(Al)-(OH)<sub>2</sub> partially hydrated.

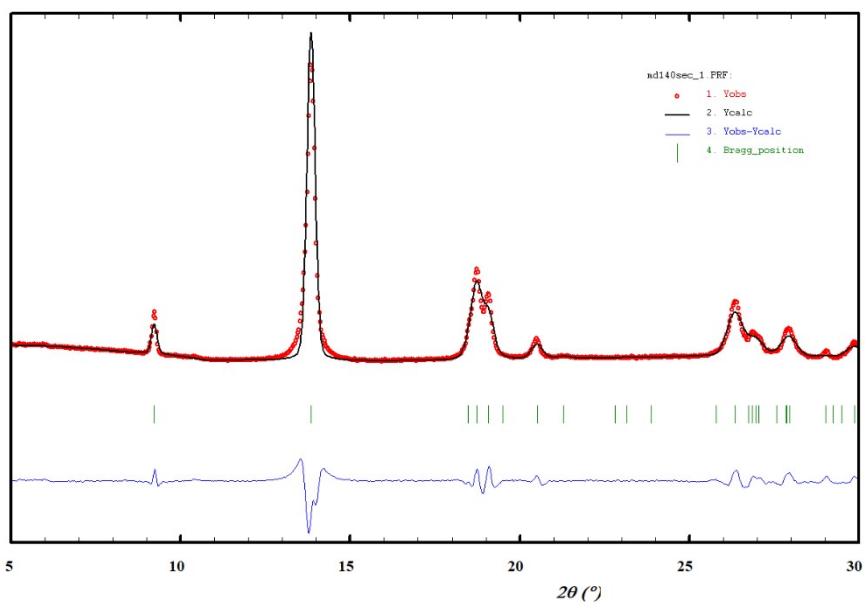

**Figure S4.** Le Bail fit of MIL-53(Al)-(OH)<sub>2</sub> dried.

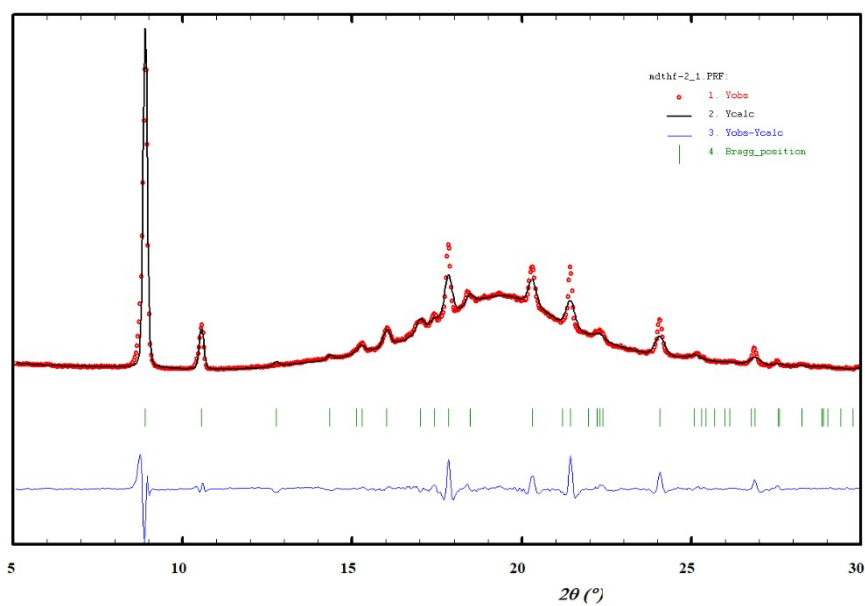

**Figure S5.** Le Bail fit of MIL-53(Al)-(OH)<sub>2</sub> suspended in THF.

| Compound           | a (Å)     | b (Å)     | c (Å)    | β (°)     | V (Å <sup>3</sup> ) | SG          | form |
|--------------------|-----------|-----------|----------|-----------|---------------------|-------------|------|
| as-prepared        | 17.201(5) | 12.251(3) | 6.646(2) | -         | 1400.4(6)           | <i>Imcm</i> | LP   |
| fully hydrated     | 17.540(6) | 11.650(2) | 6.636(2) | -         | 1355.9(6)           | <i>Imcm</i> | LP   |
| partially hydrated | 19.702(7) | 7.656(2)  | 6.585(2) | 103.85(2) | 964.4(5)            | <i>C2/c</i> | NP   |
| dry                | 19.22(1)  | 6.761(3)  | 6.646(4) | 93.75(5)  | 862.0(7)            | <i>A2/m</i> | CP   |
| in THF             | 16.759(7) | 12.347(5) | 6.654(4) | -         | 1377(1)             | <i>Pnam</i> | LP   |

**Table S1** Unit-cell parameters of MIL-53(Al)-(OH)<sub>2</sub> with various pore fillings determined from PXRD. SG = possible space group; CP = close pore, NP = narrow pore, LP = large pore.  $\lambda = 1.5406$  Å.

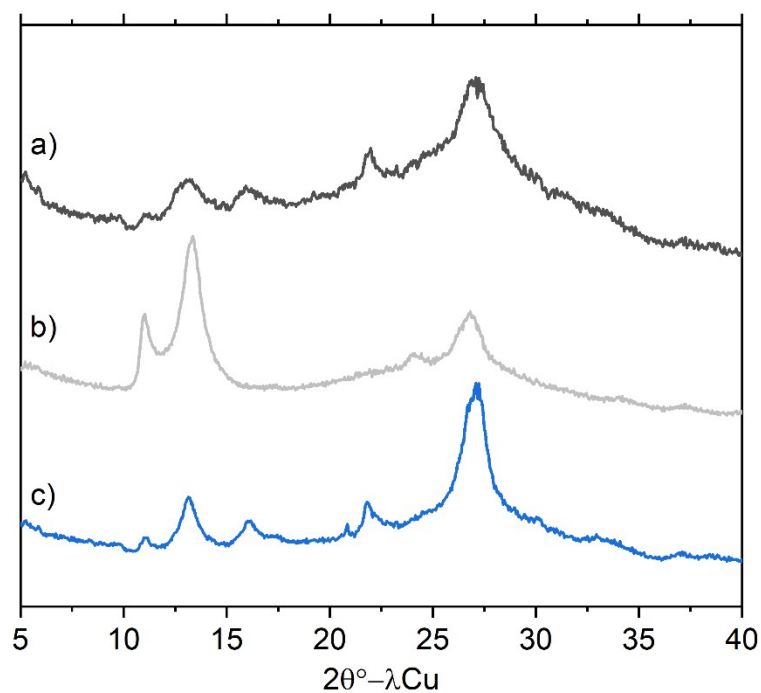

**Figure S6.** PXRD patterns of the products of the reaction between MIL-53(Al)-(OH)<sub>2</sub> and LiOMe in MeOH/THF under various conditions: a) 8 eq., 50°C, 16 hours; b) 3 eq., 15 days, 50°C; c) Li<sub>4</sub>(DOBDC) prepared in MeOH/THF.

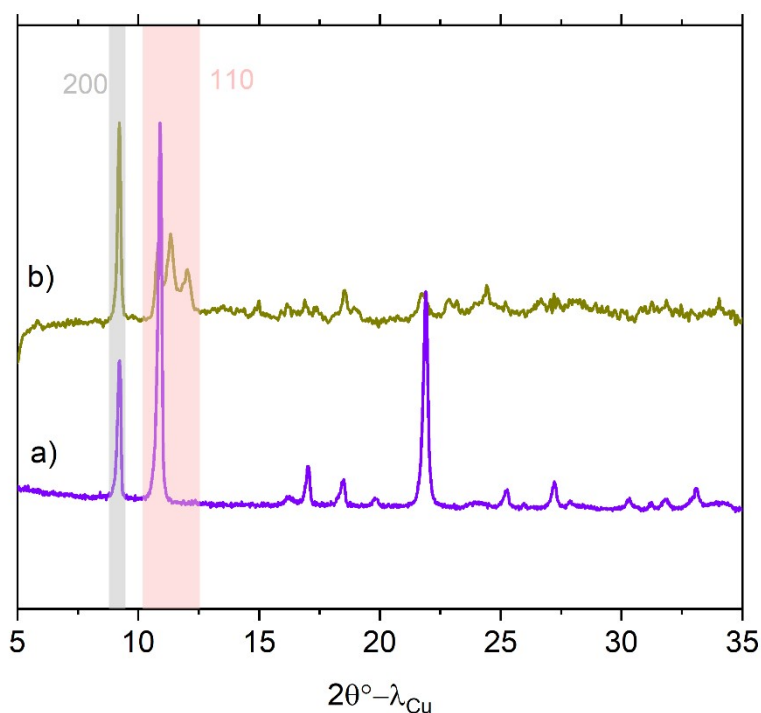

**Figure S7.** PXRD patterns of MIL-53(Fe)-(OH)<sub>2</sub>: hydrated (violet) and dried (khaki) at 155°C under vacuum. The positions of the 200 and 110 Bragg peaks are highlighted. The multiplicity observed for the dried solid indicates the presence of a mixture of pore opening (at least NP-H<sub>2</sub>O and CP).

## 2. Optical images

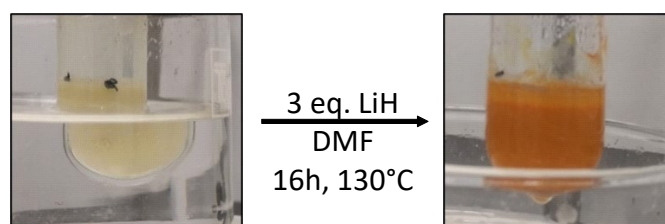

**Figure S8.** Evolution of the color of the suspension of MIL-53(Al)-(OH)<sub>2</sub> in DMF in the presence of 3 eq. of LiH with time.

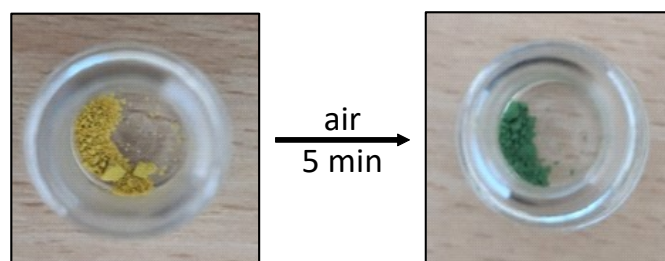

**Figure S9.** Evolution of the color of the MIL-53(Al)-(OH)<sub>2</sub> treated with 3 eq. of LiOMe in MeOH/THF upon exposure to air.

## 3. Thermogravimetric analysis

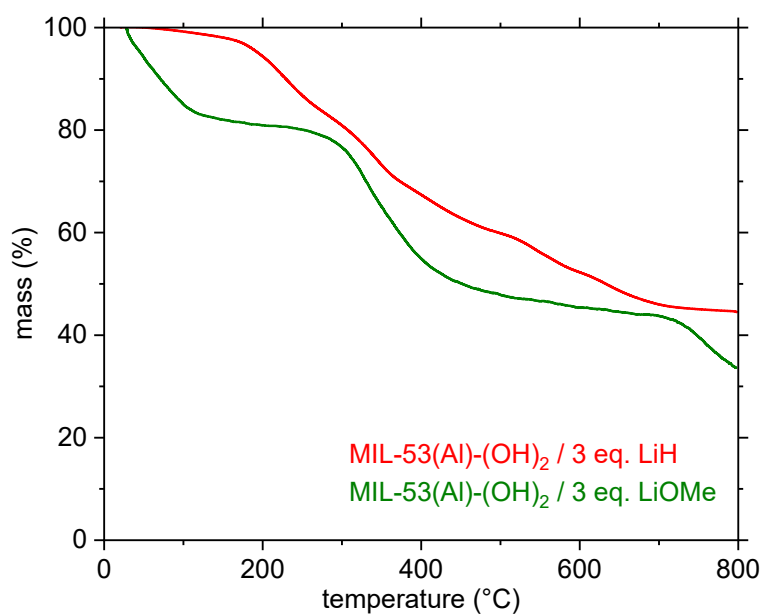

**Figure S10.** TG curves of the product of the reaction between MIL-53-(Al)(OH)<sub>2</sub> and 3 eq. of LiH in DMF (red) and 3 eq. of LiOMe in MeOH/THF (green), measured at a heating rate of 5°C min<sup>-1</sup> under Ar.

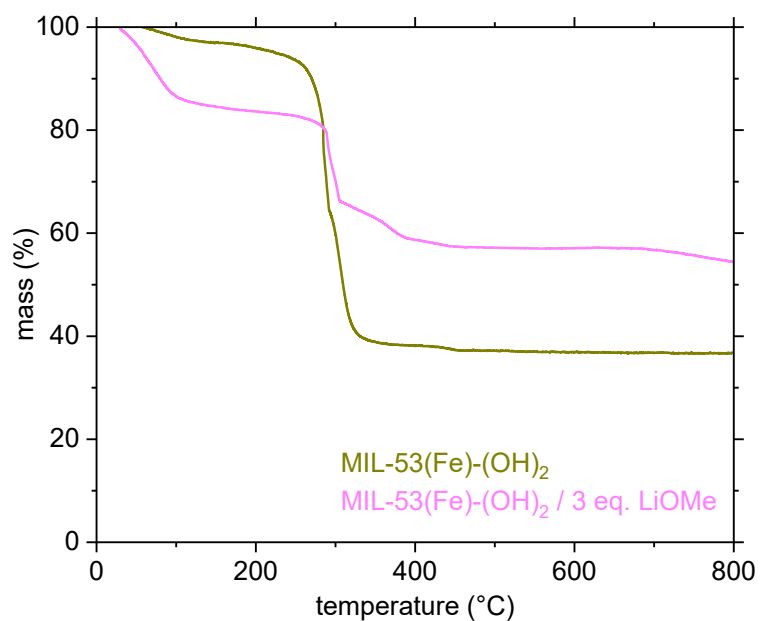

**Figure S11.** TG curves of MIL-53-(Fe)(OH)<sub>2</sub> (khaki) and of the product of the reaction between MIL-53-(Fe)(OH)<sub>2</sub> and 3 eq. of LiOMe in MeOH/THF (pink), measured at a heating rate of 5°C min<sup>-1</sup> under Ar.

#### 4. Infrared spectroscopy

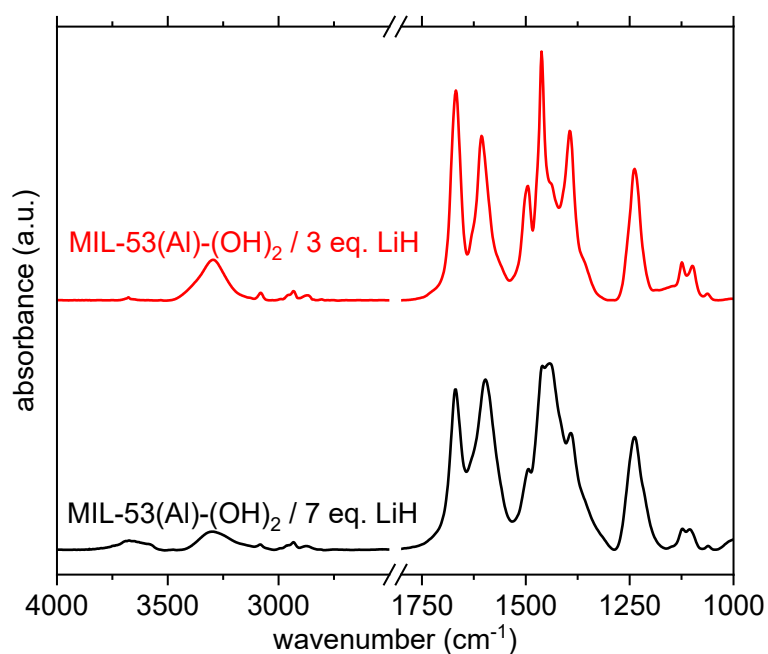

**Figure S12.** IR spectra of the products of the reaction between MIL-53-(Al)(OH)<sub>2</sub> and 3 eq. of LiH in DMF (red) and 7 eq. of LiH in DMF (pink). Even with excess of hydride, OH vibration bands remain visible, as well as bands characteristic of DMF (e.g. C=O vibration band at ~1660 cm<sup>-1</sup>).

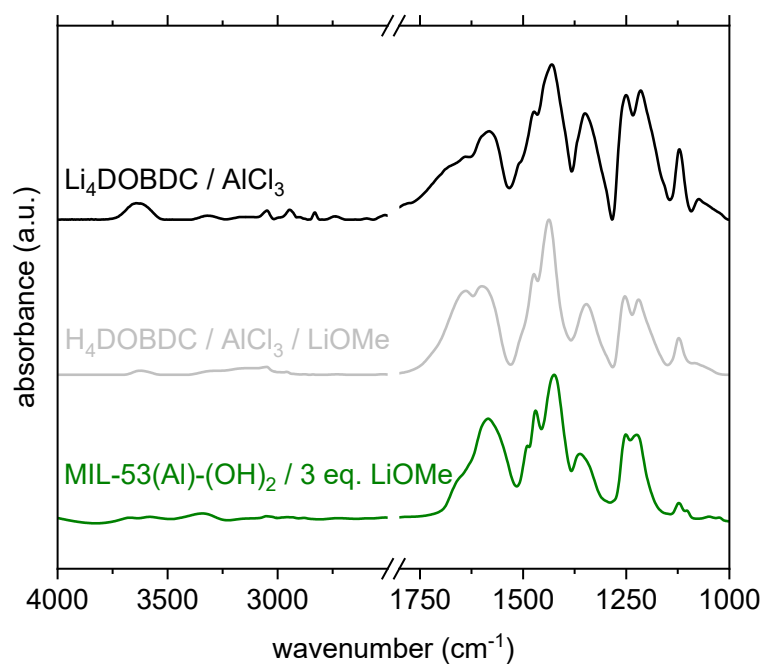

**Figure S13.** IR spectra of the products of the direct reaction between  $\text{H}_4\text{DOBDC}$ ,  $\text{AlCl}_3$  and  $\text{LiOMe}$  (grey), and  $\text{Li}_4(\text{DOBDC})$  and  $\text{AlCl}_3$ , both in  $\text{MeOH/THF}$ , compared to the one of  $\text{MIL-53(Al)-(OH)}_2$  treated with 3 eq. of  $\text{MeOH/THF}$  (green). The shoulder at  $\sim 1650 \text{ cm}^{-1}$  indicates the presence of free carboxylic groups for direct syntheses.

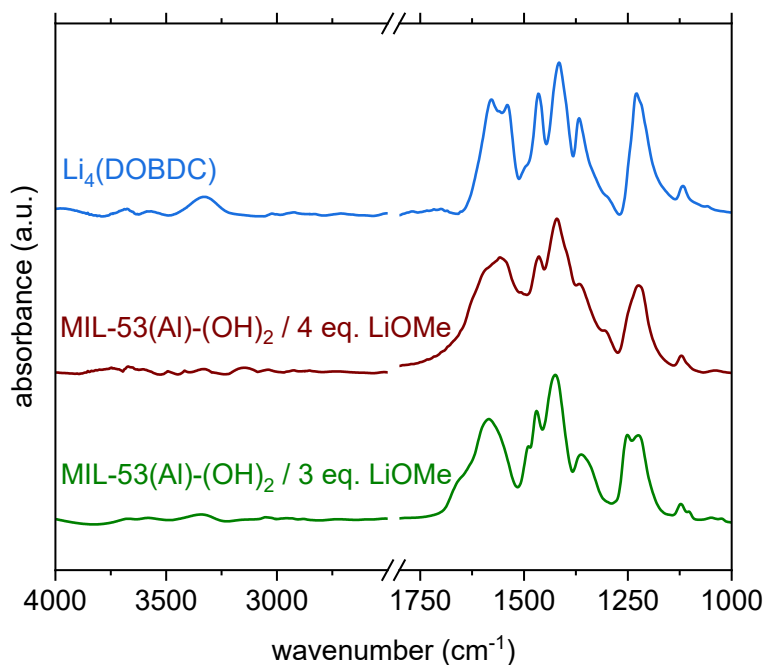

**Figure S14.** IR spectra of the products recovered after reaction of  $\text{MIL-53(Al)(OH)}_2$  with 3 and 4 eq. of  $\text{LiOMe}$  in  $\text{MeOH/THF}$  (green and brown, respectively), compared to the one of  $\text{Li}_4(\text{DOBDC})$  (blue).



## 5. Transmission electron microscopy

a)

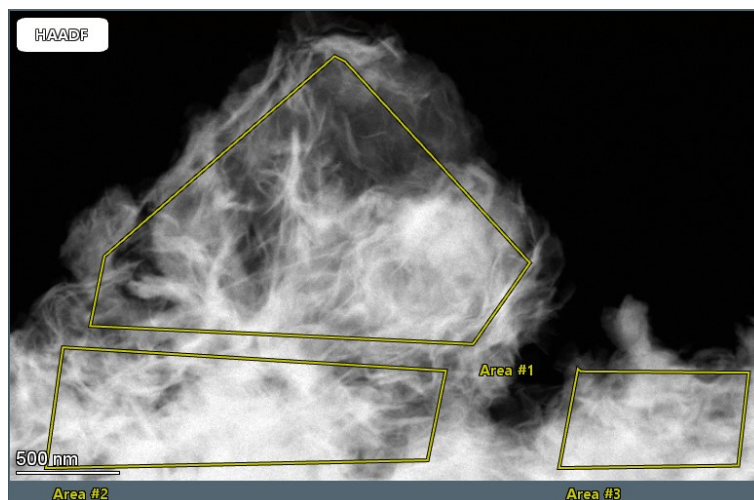

b)

|      | Area #1 | Area #2 | Area #3 | average | Li <sub>4</sub> (DOBDC) |
|------|---------|---------|---------|---------|-------------------------|
| Al/C | 0.006   | 0.005   | 0.007   | 0.006   | 0                       |
| O/C  | 0.75    | 0.71    | 0.79    | 0.75    | 0.75                    |

**Figure S15.** STEM-EDX analysis of the reaction product between MIL-53(Al)-(OH)<sub>2</sub> and 8 eq. of LiOMe in MeOH/THF at 50°C for 16 hr. a) STEM pictures; b) atomic ratios deduced from the EDX analysis, showing the almost complete departure of Al<sup>3+</sup>.

a)

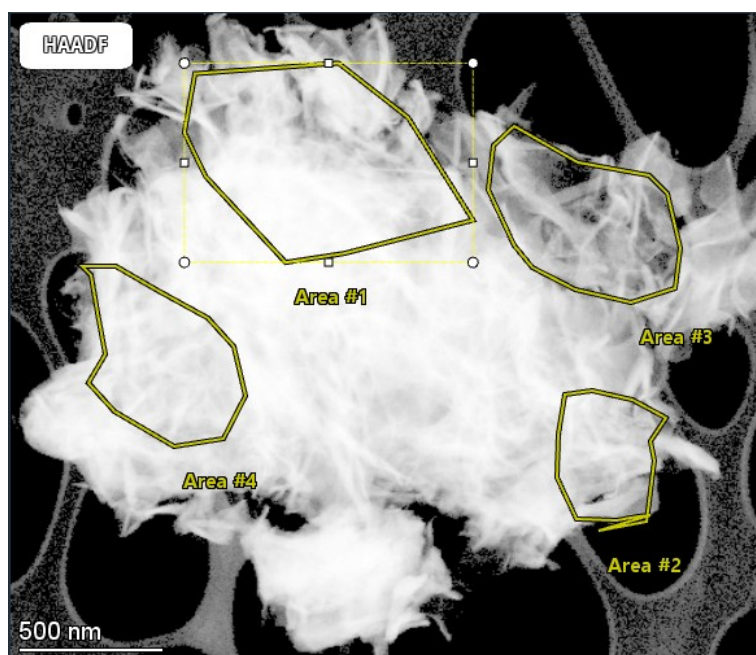

b)

|      | Area #1 | Area #2 | Area #3 | Area #4 | average | $\text{Li}_7\text{Al}(\text{DOBDC})_{5/2}$ |
|------|---------|---------|---------|---------|---------|--------------------------------------------|
| C/Al | 21      | 15      | 25      | 20      | 20      | 20                                         |
| C/O  | 1.4     | 1.3     | 1.7     | 1.4     | 1.4     | 1.3                                        |
| O/Al | 15      | 12      | 15      | 14      | 14      | 15                                         |

**Figure S16.** STEM-EDX analysis of the reaction product between MIL-53(Al)-(OH)<sub>2</sub> and 4 eq. of LiOMe in MeOH/THF at 50°C for 16 hr. a) STEM pictures; b) atomic ratios deduced from the EDX analysis, showing that the composition is close to  $\text{Li}_7\text{Al}(\text{DOBDC})_{5/2}$ .

## 6. Inductively coupled plasma-atomic emission spectroscopy

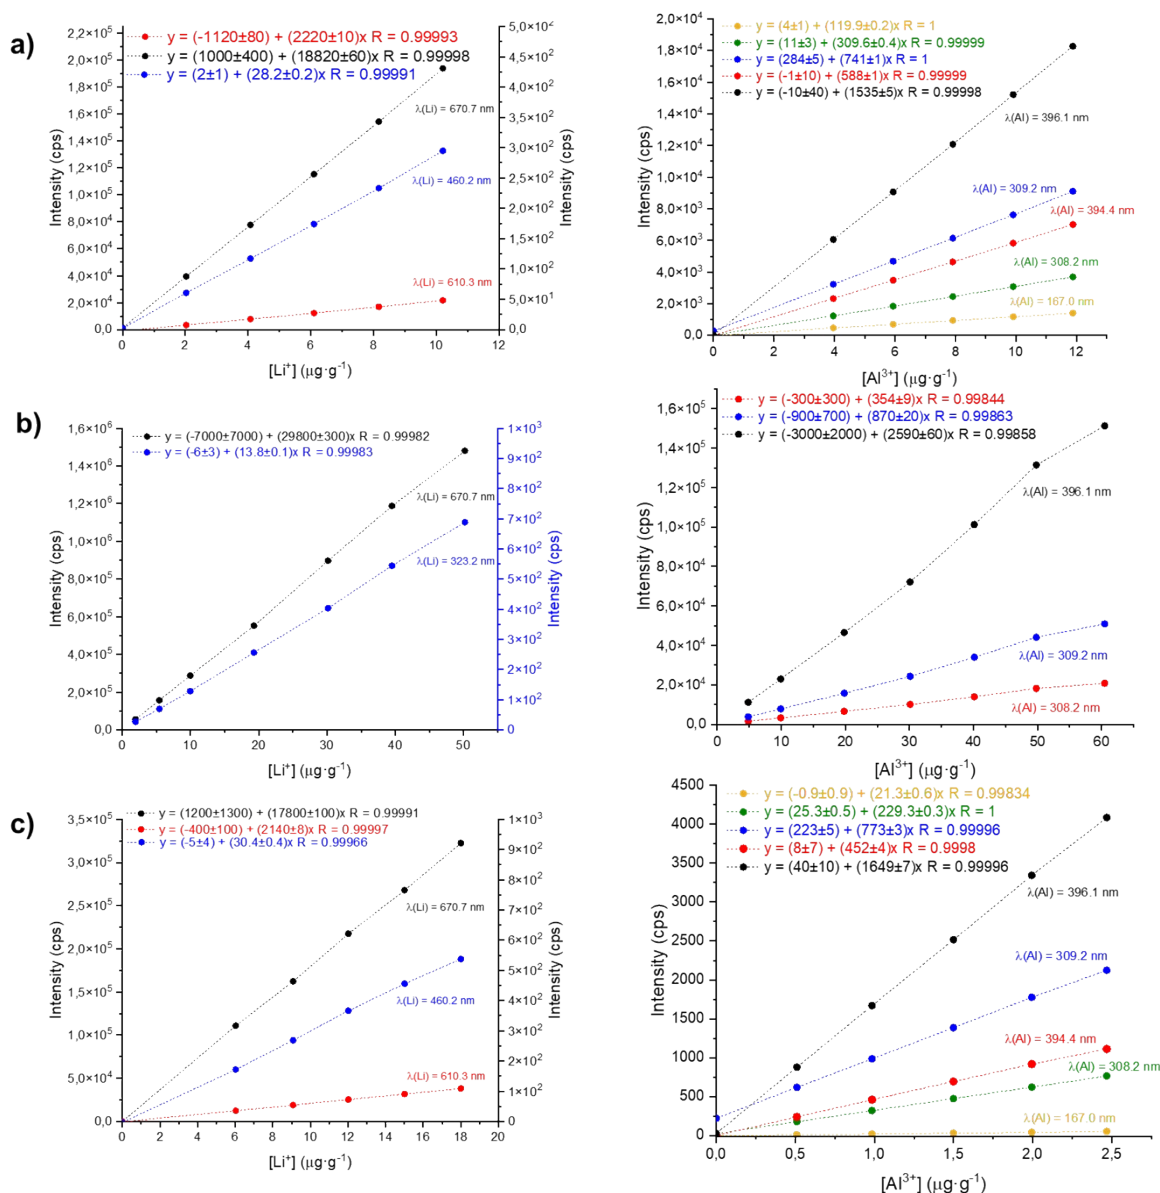

**Figure S17.** Calibration curves of the ICP-AES used to quantify the elemental composition for the MIL-53(Al)-(OH)<sub>2</sub> lithiated with 3 eq. (a), 4 eq. (b) and 8 eq. (c) of LiOMe in MeOH/THF. The composition was quantified by averaging the results obtained with the different curves.

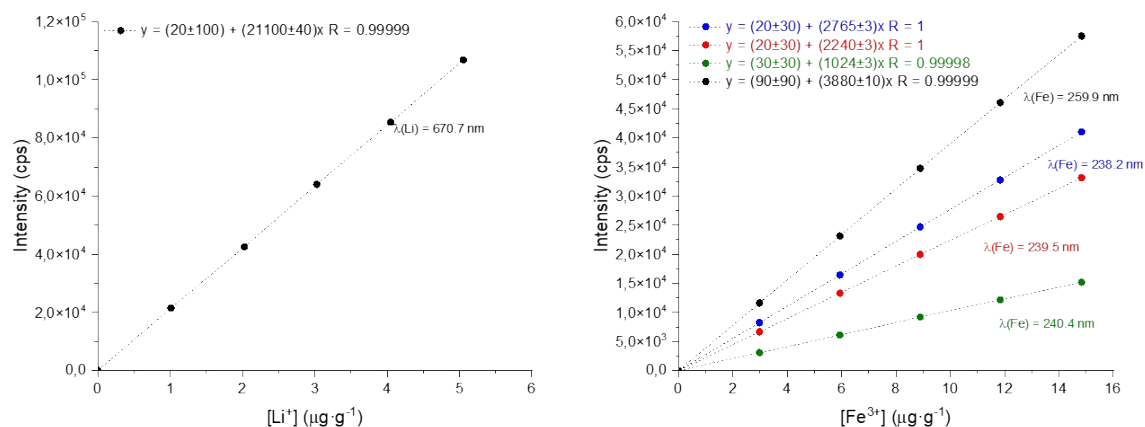

**Figure S18.** Calibration curves of the ICP-AES used to quantify the elemental composition for the MIL-53(Fe)-(OH)<sub>2</sub> lithiated with 3 eq. of LiOMe in MeOH/THF. The composition was quantified by averaging the results obtained with the different curves.
